# Supplementary material
Source: PubMed Central journal article supplement (PMC10287030)
Supplement: NIHMS1881374-supplement-2.pdf [file NIHMS1881374-supplement-2.pdf]

# Sexual History

Please complete the survey below.

**For the purposes of this questionnaire, sexual intercourse will be defined as when a male puts his penis inside your vagina. We are only interested in asking about sexual situations where you wanted to have sexual intercourse, not where you were forced into sexual intercourse. If you have a situation where you were forced into sexual intercourse and you would like to speak with someone here, please notify the research team member who provided you the tablet.**

At any time in your life, have you ever had sexual intercourse with a male, that is, made love, had sex, or gone all the way?  Yes  
 No

Counting all your male sexual partners, even those you had intercourse with only once, how many males have you had sexual intercourse with in your life? \_\_\_\_\_  
(ENTER number of partners total)

During the last 12 months, that is, since (INTERVIEW MONTH, INTERVIEW YEAR - 1), how many males, if any, have you had sexual intercourse with? \_\_\_\_\_  
(ENTER number of partners in last year)

How many times have you been pregnant in your life? \_\_\_\_\_

Have you ever used birth control pills?  Yes  
 No

Have you had sex with a partner who used a condom?  Yes  
 No

Have you ever used Depo-Provera, an injectable shot given every three months?  Yes  
 No

Have you ever had sex with a partner who used withdrawal or "pulling out"? This is when a male takes his penis out of you before he orgasms, or comes.  Yes  
 No

Have you ever used the calendar rhythm method to prevent pregnancy? With these methods, a woman counts the days in her menstrual cycle to identify which days she can get pregnant, or "unsafe" days.  Yes  
 No

Have you ever used the "Standard Days Method" or "Cycle Beads" to prevent pregnancy? These methods identify days 8 to 19 of the cycle as days a woman can get pregnant, or "unsafe" days.  Yes  
 No

Have you ever used the contraceptive patch?  Yes  
 No

Have you ever used the vaginal contraceptive ring or "NuvaRing"?  Yes  
 No

---

Have you ever used Emergency contraception? Some examples of names for this are: "Plan B", "Preven", "Ella", "Next Choice" or "Morning After" pills? "Take Action" and "My Way" also count.

- Yes  
 No

---

If YES, how many times have you used emergency contraception? \_\_\_\_\_

---

Did you use emergency contraception because you were worried your birth control method would not work, you didn't use birth control that time, or for some other reason? Select all that apply.

- You were worried your birth control method would not work  
 You didn't use birth control that time  
 Some other reason

---

Please select the birth control methods that you have used. You may select more than one.

- Hormonal implants (Norplant™ or Implanon™, or Nexplanon™)  
 Diaphragm  
 Female condom, vaginal pouch  
 Foam  
 Jelly or cream  
 Cervical cap  
 Suppository, insert  
 Today™ sponge  
 IUD, coil, loop  
 Lunelle™  
 Other method  
 No other methods ever used

---

If selected other method, please describe here \_\_\_\_\_

---

Have you ever used an IUD, or intrauterine device?

- Yes  
 No

---

If YES, which type of IUD have you used?

- Copper-bearing (such as Copper-T™ or ParaGard™)  
 Hormonal IUD (such as Mirena™ or Skyla™)  
 Other
