# Supplementary material
Source: PubMed Central journal article supplement (PMC10287030)
Supplement: NIHMS1881374-supplement-3.pdf [file NIHMS1881374-supplement-3.pdf]

# Adolescent Post Counseling Survey

Please complete the survey below.

---

1. Are you interested in starting a type of birth control?  Yes  
 No

---

a) If yes, what type?

\_\_\_\_\_

---

b) If yes, would you prefer to start that now or go to a clinic soon to get started?

\_\_\_\_\_

---

2. How likely are you to start birth control with the next 2 months?  Unsure  
 Very Unlikely  
 Unlikely  
 Likely  
 Very Likely

---

3. Why do you think you are [likely / unlikely] to start birth control soon?

\_\_\_\_\_
