# Supplementary material
Source: PubMed Central journal article supplement (PMC10287030)
Supplement: NIHMS1881374-supplement-5.pdf [file NIHMS1881374-supplement-5.pdf]

# APP Feasibility Survey

This survey is for APP's ONLY!

---

APP Name

---

Date

---

---

1. The counseling was easy to deliver

- Strongly Disagree
- Disagree
- Neutral
- Agree
- Strongly Agree

---

2. Overall I was satisfied with this counseling

- Strongly Disagree
- Disagree
- Neutral
- Agree
- Strongly Agree

---

3. There was enough time to complete this counseling during the ED visit

- Strongly Disagree
- Disagree
- Neutral
- Agree
- Strongly Agree

---

4. I felt competent to provide contraceptive counseling today

- Strongly Disagree
- Disagree
- Neutral
- Agree
- Strongly Agree

---

5. My confidence in providing counseling improves with practice

- Strongly Disagree
- Disagree
- Neutral
- Agree
- Strongly Agree
- N/A (First counseling)

---

6. After the counseling today, I felt less nervous about counseling in the ED setting

- Strongly Disagree
- Disagree
- Neutral
- Agree
- Strongly Agree
- N/A

---

7. I feel my ability to provide quality counseling will improve over time

- Strongly Disagree
- Disagree
- Neutral
- Agree
- Strongly Agree
- N/A

---

Did the participant want to start a form of birth control after the counseling?

- Yes
- No

---

Did the participant physically receive a form of birth control during their ED visit?  Yes  
 No

---

If so, what were they given? \_\_\_\_\_

---

Did the participant receive a birth control prescription?  Yes  
 No

---

If so, what were they given? \_\_\_\_\_

---

Did the participant want to schedule a follow-up appointment?  yes  
 no  
 undecided

---

If yes, did you schedule the follow-up appointment?  yes  
 no  
 In process

---

Notes

---

(Please write any notes regarding the scheduling of follow up)

---

If yes, what was the location of the scheduled appointment? \_\_\_\_\_

---

If yes, what was the date of the scheduled appointment? \_\_\_\_\_
