# Supplementary material
Source: PubMed Central journal article supplement (PMC10287030)
Supplement: NIHMS1881374-supplement-6.pdf [file NIHMS1881374-supplement-6.pdf]

# Provider Fidelity Form/ Audio Uploads

Record ID

\_\_\_\_\_

APP Name

\_\_\_\_\_

Enrolled Participant Study ID Number

\_\_\_\_\_

Date of counseling session

\_\_\_\_\_

Date Fidelity Form Complete

\_\_\_\_\_

Audio Recording of counseling session

Audio Recording of counseling session

(Use if multiple uploads for the same patient)

Audio Recording of counseling session

(Use if multiple uploads for the same patient)

## In this Interaction, did the educator:

Establish rapport with the participant

- Yes  
 No  
 N/A

Express empathy towards the participant

- Yes  
 No  
 N/A

Ask open ended questions throughout the visit

- Yes  
 No  
 N/A

Explain confidentiality in the beginning of the visit

- Yes  
 No  
 N/A

Create a safe environment

- Yes  
 No  
 N/A

Discuss the participant's personal goals  
(career, educational, and/or family planning)

- Yes  
 No  
 N/A

Consider patient's cultural background/beliefs when  
providing care

- Yes  
 No  
 N/A

---

Explore the risks, benefits, and side effects profiles of contraception methods

- Yes  
 No  
 N/A

---

Discuss dual condom contraceptive use for STI/STD protection

- Yes  
 No  
 N/A

---

Use a tiered approach to contraception education, sharing the most effective methods first

- Yes  
 No  
 N/A

---

Use shared decision-making to establish a contraceptive plan

- Yes  
 No  
 N/A

---

Provide medically accurate information

- Yes  
 No  
 N/A

---

Provide counseling in a non-judgmental way

- Yes  
 No  
 N/A

---

Respond appropriately to participant affect

- Yes  
 No  
 N/A

---

Demonstrate principles of teach-back

- Yes  
 No  
 N/A

---

Emphasize need for follow-up care, if desired, at a specialty clinic, primary care site or title X clinic

- Yes  
 No  
 N/A

---

Offer the patient referral assistance OR title X clinic information if desired

- Yes  
 No  
 N/A

---

Please provide any general comments about the counseling session

---
